# Supplementary material
Source: publisher figshare collection journal article supplement (https://karger.figshare.com/articles/dataset/_/7998296)
Supplement: Supplementary file 2 [file 1]

## **Supplementary Material**

**Figure S1. Summary of study inclusion and exclusion process.** \* Electronic medical records were retrieved from Big Data Application Platform supported by Changsha Han Cloud Information Technology Co. Ltd.

Abbreviations: TG: transplant glomerulopathy; eGFR: estimated glomerular filtration rate; cAMR: chronic antibody-mediated rejection; TMA, thrombotic microangiopathy.

**Figure S2. The heterogeneity of TG cases is displayed through two-way hierarchical clustering with regard to the presence of C4d, DSA, HCV, and TMA.**

Abbreviations: TG, transplant glomerulopathy; DSA, donor-specific antibody; HCV, hepatitis C virus; TMA, thrombotic microangiopathy; AMR, antibody-mediated rejection; Pos, positive; NA, not available; Neg, negative.
