# Supplementary material
Source: publisher figshare collection journal article supplement (https://karger.figshare.com/articles/dataset/_/7998296)
Supplement: Supplementary file 3 [file 1 › 500043_sm3.pdf]

| TG Findings |     |     |     | Probable Etiology | N  |
|-------------|-----|-----|-----|-------------------|----|
| C4d         | DSA | HCV | TMA |                   |    |
| 110         | 47  | 16  |     | AMR+HCV           | 16 |
|             |     | 31  | 1   | AMR+TMA           | 1  |
|             |     |     |     | AMR               | 30 |
|             | 56  | 8   |     | AMR+HCV           | 8  |
|             |     | 48  | 1   | AMR+TMA           | 1  |
| 70          |     |     |     | AMR               | 47 |
|             |     | 1   | 1   | AMR+HCV+TMA       | 1  |
|             | 7   | 6   |     | AMR               | 6  |
|             | 28  | 1   |     | AMR+HCV           | 1  |
|             |     | 27  |     | AMR               | 27 |
|             | 30  | 9   | 1   | HCV+TMA           | 1  |
|             |     |     |     | HCV               | 8  |
|             |     | 21  |     | Idiopathic        | 21 |
|             | 12  | 3   |     | HCV               | 3  |
|             |     | 9   | 2   | TMA               | 2  |
|             |     |     |     | Idiopathic        | 7  |

Neg

Pos

Neg

NA

Pos

Neg

Pos

Neg

Pos
